# Supplementary material
Source: PubMed Central journal article supplement (PMC11105084)
Supplement: 18_2019_3436_MOESM1_ESM.pdf [file 18_2019_3436_MOESM1_ESM.pdf]

# Supplementary Figure 1

A

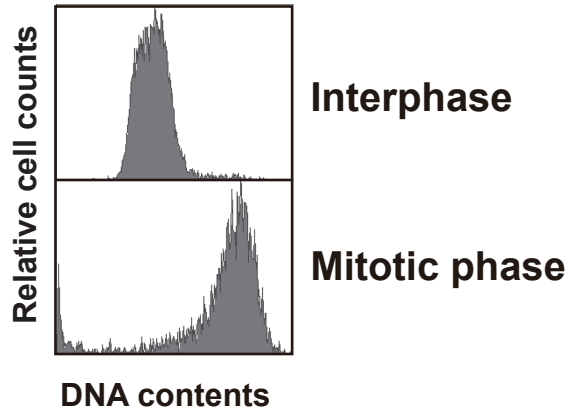

B

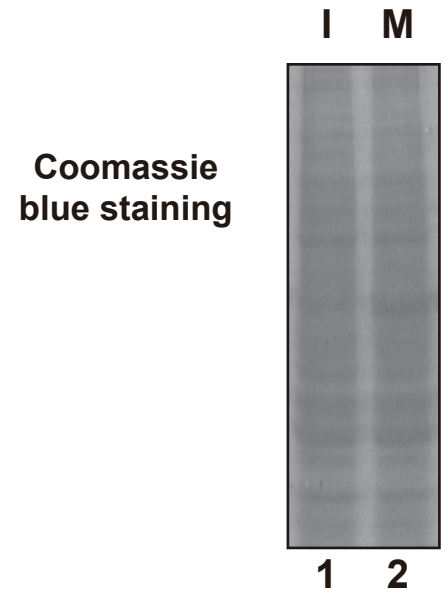

# Supplementary Figure 2

A

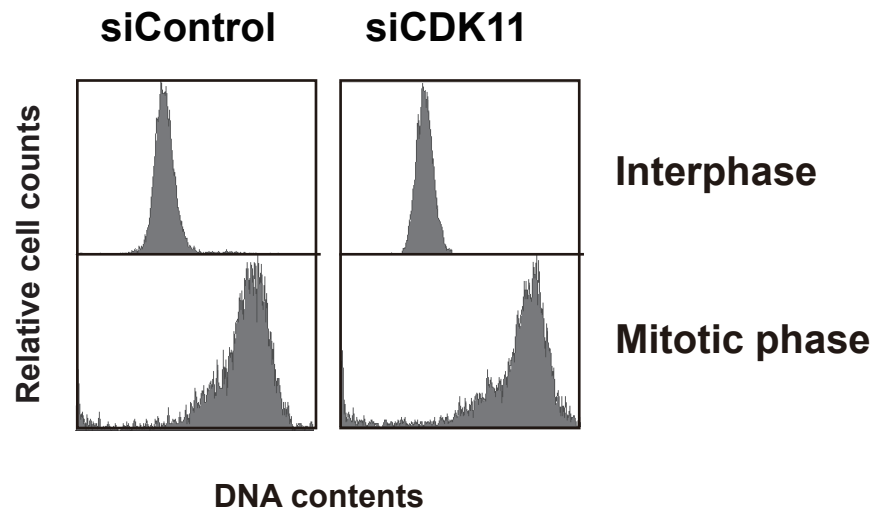

B

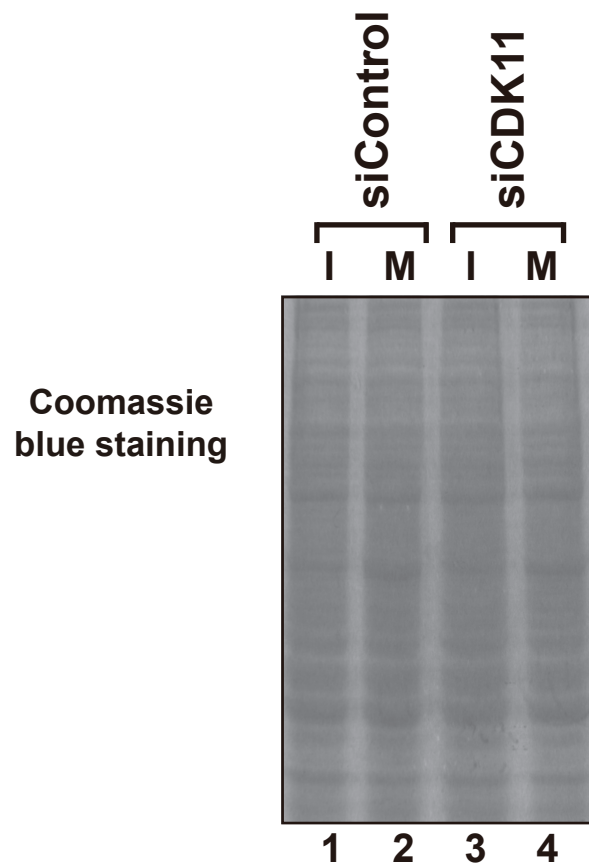

# Supplementary Figure 3

## A

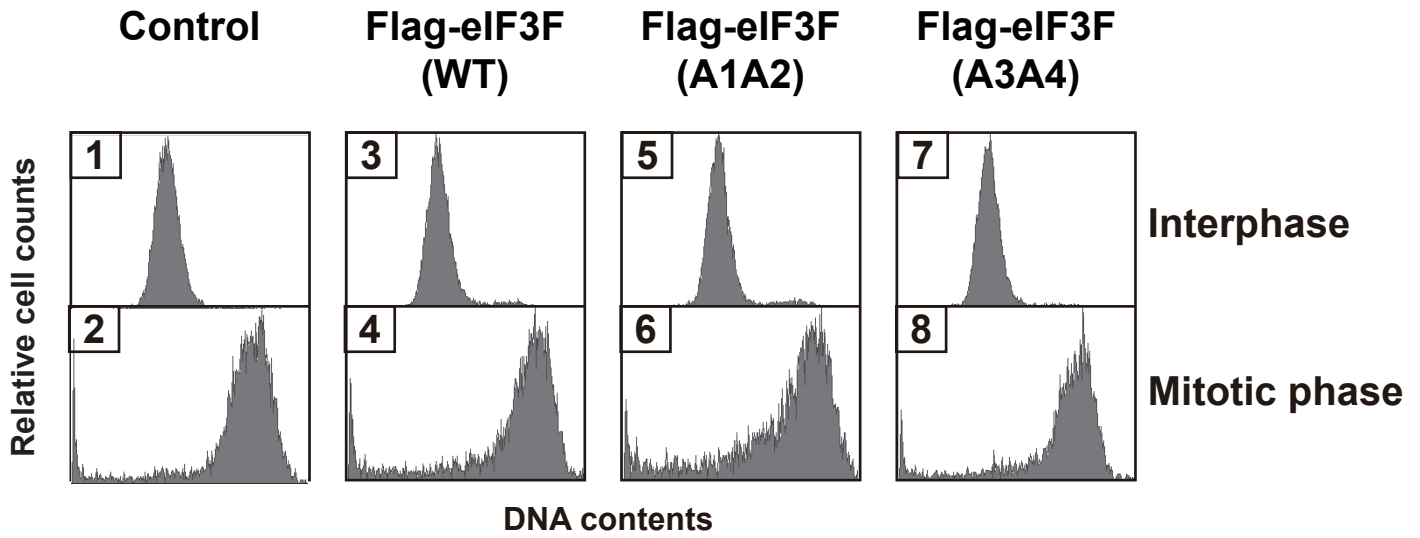

## B

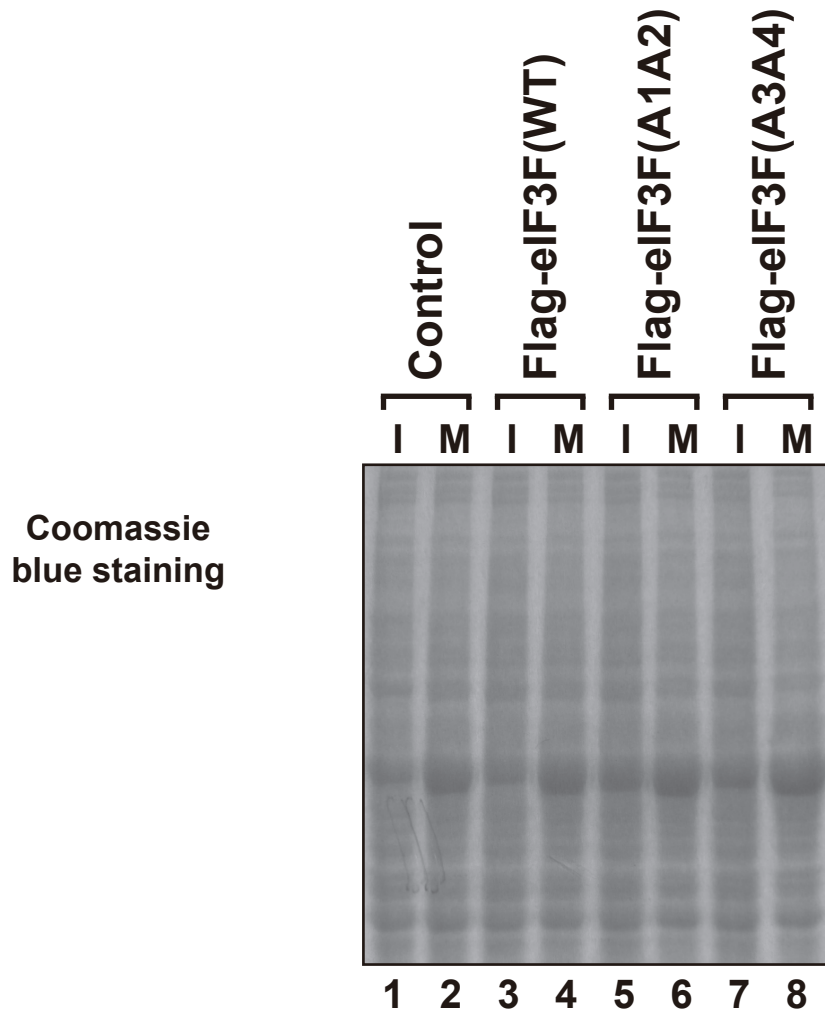

# Supplementary Figure 4

## A

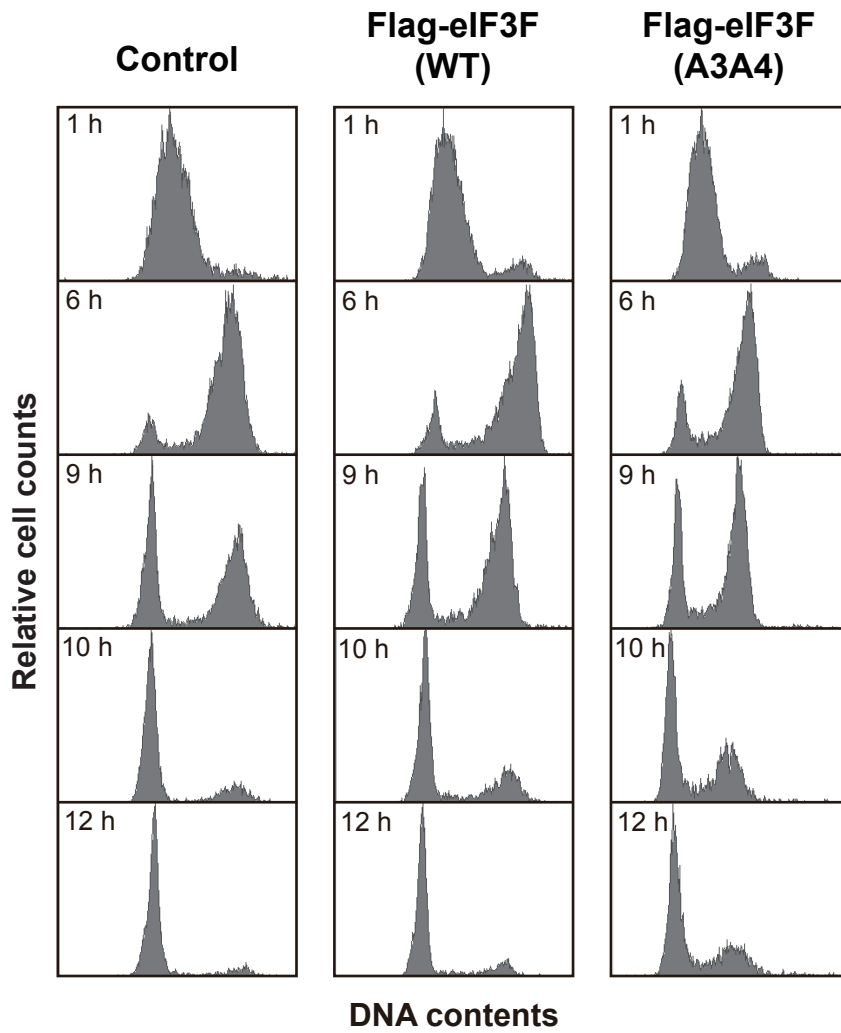

## B

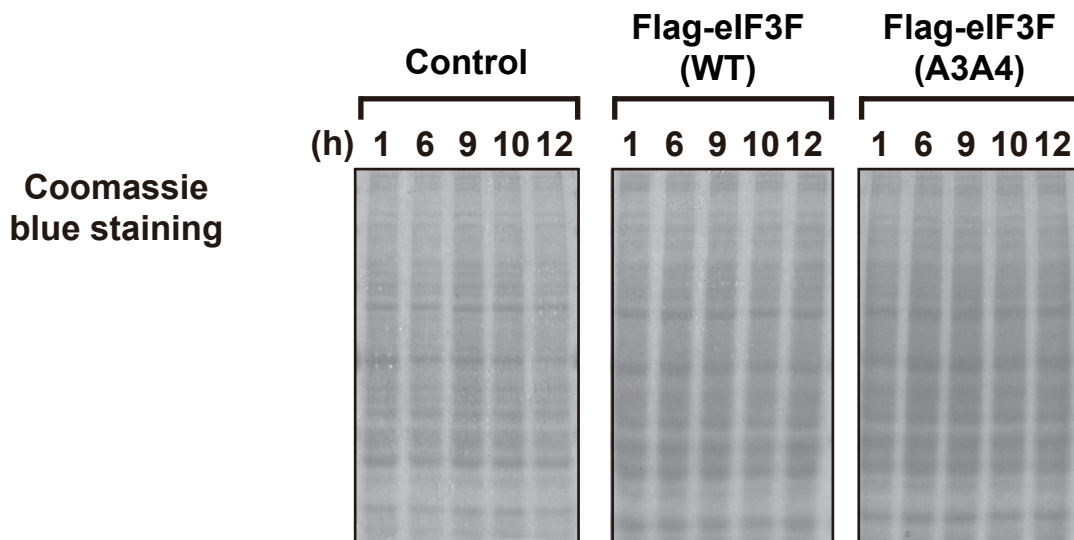

# Supplementary Figure 5

## A

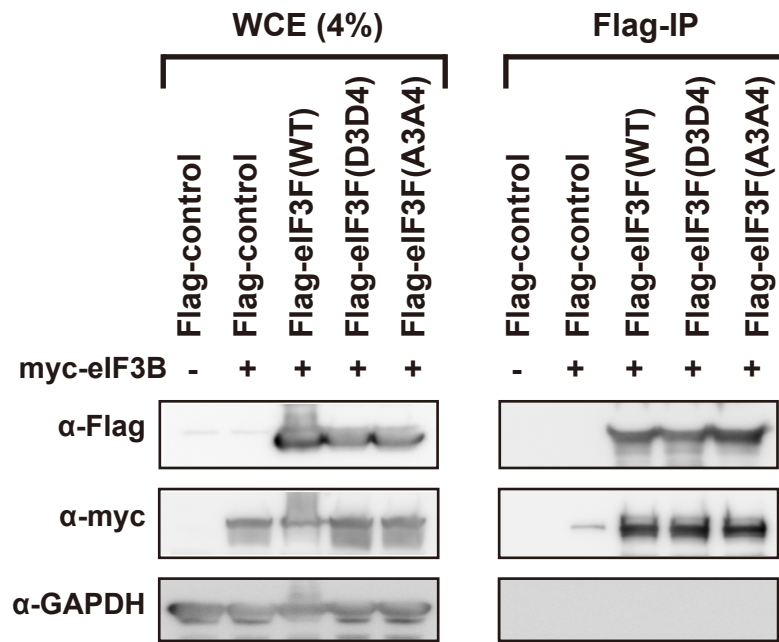

## B

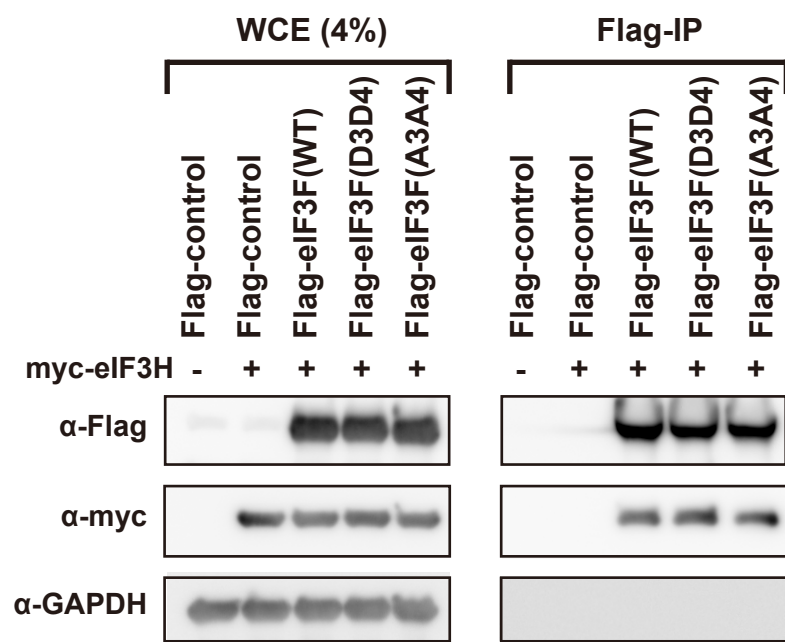

## C

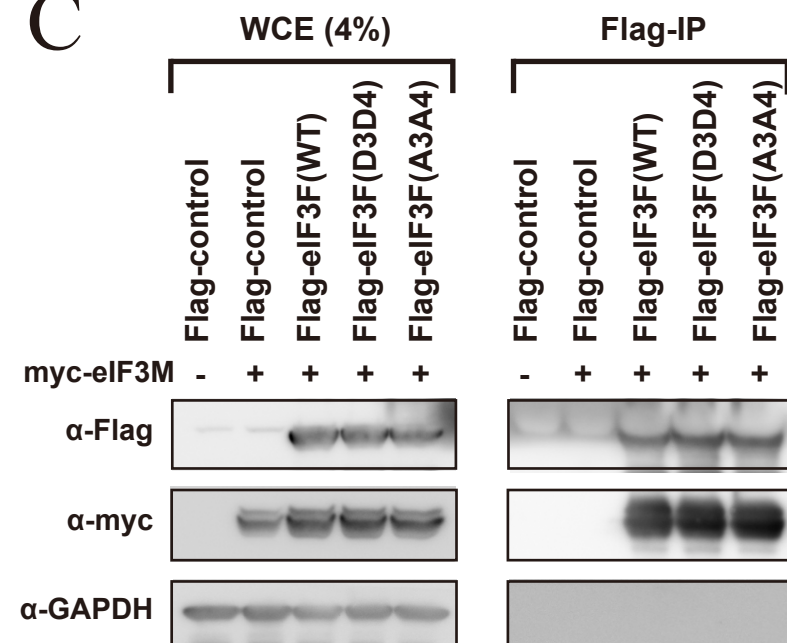

## D

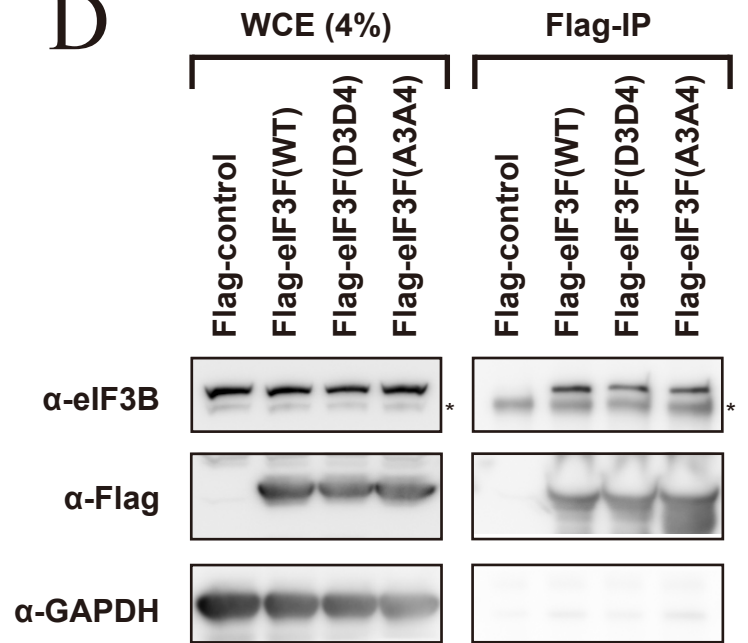

# Supplementary Figure 6

## A

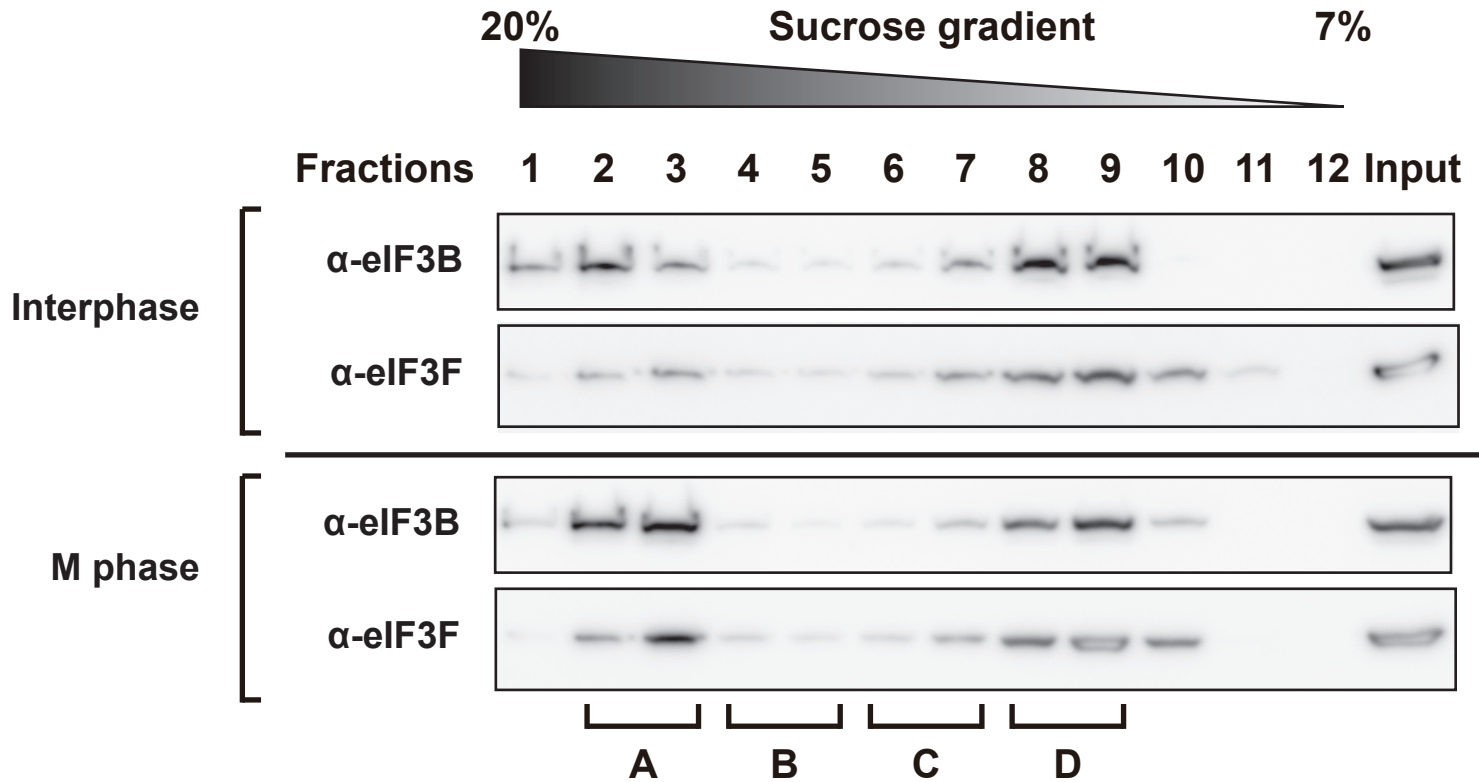

## B

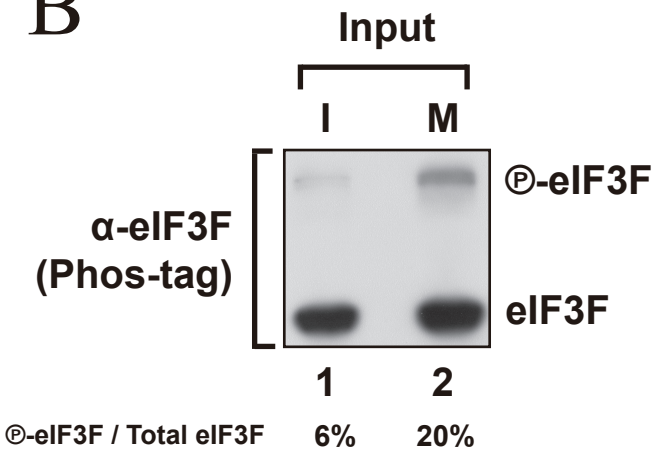

## C

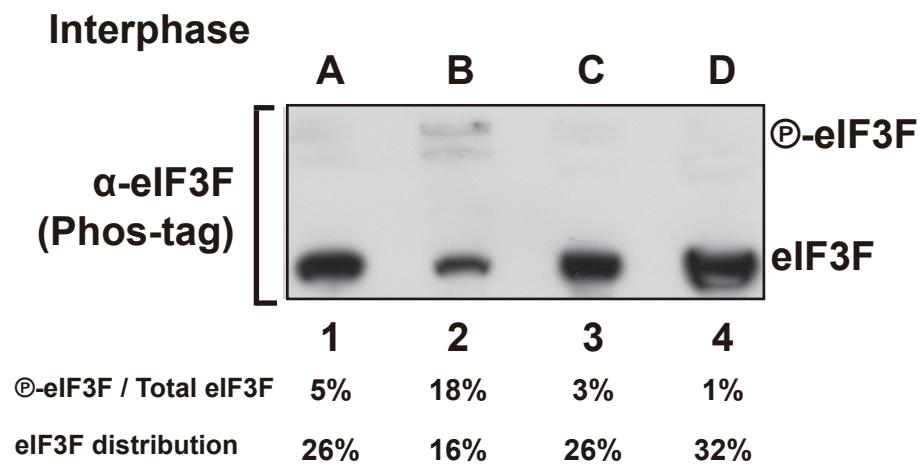

### Mitotic phase

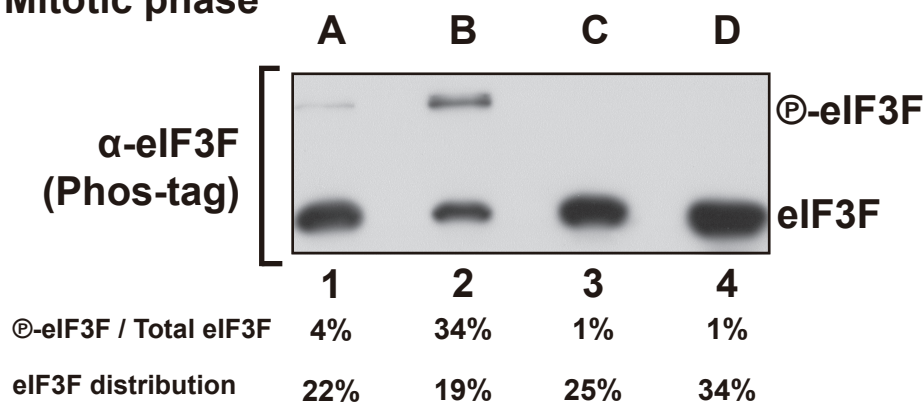

# Supplementary Figure 7

## A

### eIF3F sequence

|                   | Thr119                                                                 |     |        |
|-------------------|------------------------------------------------------------------------|-----|--------|
| <b>Human</b>      | NEGAARVIG <b>T</b> LLGTVD--KHSVEVTNCF SVPHNESEDEVAVDMEFAKNMYELHKKVSPNE | 167 |        |
| <b>Mouse</b>      | NEGAARVIG <b>T</b> LLGTVD--KHSVEVTNCF SVPHNESEDEVAVDMEFAKNMYELHKKVSPNE | 171 |        |
| <b>Zebrafish</b>  | NEGASRVIG <b>T</b> LLGTAD--KHSVDVTNCF SVPHNESEDEVAVDMEFAKNMYELHKKVSPSE | 83  |        |
| <b>C. elegans</b> | NTGQEKCMG <b>T</b> LMGYE--KGSIQVTNCF AIFNESNDLEIDDQFNQQMISALKKTS PNE   | 88  |        |
| <b>S. pombe</b>   | SENNQRVIG <b>T</b> LLGTRSEDGREIEIKSCFAVPHNESSEQVEVEMEYHRAMYHLHLKANPRE  | 100 |        |
|                   | . . . : :***:* . . . . .**:*.***.* : : : * * . * *                     |     |        |
|                   |                                                                        |     | Ser258 |
| <b>Human</b>      | KAYVSTLMGVPGRTMG-V-MFTPLTVKYAYYDTERIGVDLIMKT <b>CFS</b> PNRVIGLSSDLQQ  | 271 |        |
| <b>Mouse</b>      | KAYVSTLMGVPGRTMG-V-MFTPLTVKYAYYDTERIGVDLIMKT <b>CFS</b> PNRVIGLSSDLQQ  | 275 |        |
| <b>Zebrafish</b>  | RAYVSSQMGVPGKTVG-V-MFTPLSVKYIYYDTERIGVDLLQRT <b>AS</b> PGRTNGLTDLAQ    | 187 |        |
| <b>C. elegans</b> | RAYLRKAGIPGAAGPHCAIFNPLRVELAAFPGELVAMQLIEKAL <b>DS</b> RRREATLESGLEQ   | 206 |        |
| <b>S. pombe</b>   | KTYVSSPVGITERLADSC-AFVPTPFTIRDEAVRSGLKAVAAPK <b>ND</b> PSRLASLFTDLQQ   | 215 |        |
|                   | ::*: : * : * * . . . : . * * :.* *                                     |     |        |

## B

### eIF4G sequence

|                   | Ser1232                                                               |      |
|-------------------|-----------------------------------------------------------------------|------|
| <b>Human</b>      | EDRDRGRDAVK-----REAAALPPV <b>S</b> PLKAALSEEELEK-KSKAIEEY LHLNDMKE    | 1262 |
| <b>Mouse</b>      | ED--RGRDPVK-----REATLPPV <b>S</b> PPKAALSVDEVEK-KSKAIEEY LHLNDMKE     | 1261 |
| <b>Zebrafish</b>  | DNRDRGSRDRDRSKETVKPMAAPALPP <b>PA</b> VPKPAMSEEDLDK-KSKSIEEY LHINDLKE | 1247 |
| <b>C. elegans</b> | SNTDKTDDELTEE---EKAVRAKIMNTV <b>K</b> SDLLEMSSGELSQKELVDSITDYVG-----  | 975  |
| <b>S. pombe</b>   | -----                                                                 | 1403 |
